# Supplementary material
Source: publisher figshare collection journal article supplement (https://gsapubs.figshare.com/articles/dataset/_/12527444)
Supplement: Supplementary file 1 [file 1]

**High SO<sub>2</sub> flux, sulfur accumulation, and gas fractionation at an erupting submarine volcano**

David A. Butterfield, Ko-ichi Nakamura, Bokuichiro Takano, Marvin D. Lilley, John E. Lupton, Joseph A. Resing, Kevin K. Roe

**Supplementary Methods**

Hydrothermal fluids were sampled using the Hydrothermal Fluid and Particle Sampler (HFPS). HFPS pumps fluids through a titanium intake nozzle (Supplementary Figure 5) with an in-line temperature sensor, into a teflon and titanium manifold with 24 ports, then out through a 4-liter/minute pump to an exhaust port. An insulated one-meter extension to the titanium nozzle was used for highly energetic volcanic vent sampling. While the flush pump maintained fluid flow through the manifold, a dedicated sample pump pulled the fluid into selected sample containers, which were either PVC plastic cylinders with Teflon seals, titanium cylinders with Teflon pistons and seals, 0.2 mil Tedlar plastic collapsible bags with Delrin inlet valves, or all-titanium gas-tight samplers with gold seals (Lupton et al., 2008). Free gas bubbles were trapped in a funnel and collected in gas-tight samplers. The sample containers were surrounded by ambient seawater and quickly cooled after collection. Temperature of the fluid flowing into the nozzle and through the manifold during sampling was recorded, allowing calculation of the heat content of the sample. For samples designated with BF or PF in the sample identification number, particles suspended in the flowing water were filtered out and collected on in-line filters. Coarse and heavy particles may have been partially segregated by settling during passage through the manifold. Check valves on container inlets prevented samples from leaking out and pressure relief valves allowed bags and pistons to expand to accommodate excess gas pressure. Standard titanium syringe major samplers (Von Damm 1985) were used on some dives.

Upon arrival on deck, sample containers were removed from the manifold and put into cold storage at 1-5°C. The total gas headspace volume (if present) was measured by removing it into large syringes. An aliquot of gas headspace and fluid was taken for shipboard analysis of H<sub>2</sub> and CH<sub>4</sub> by gas chromatography. Fluid was analyzed on board ship for total dissolved hydrogen sulfide (modified spectrophotometric method of Cline, 1969), pH in closed container with Ross pH electrode, and dissolved silica by spectrophotometry. Sample aliquots for major ions were filtered through 0.2µm filters and trace metal samples were acidified to pH <2 with ultrapure HCl. Major anions (chloride and sulfate) and cations (Na, K, Mg, Ca) were analyzed by ion chromatography, and in some cases also by titration, ICP-OES, or atomic absorption. Fe, Mn, and Al were analyzed by flame and graphite furnace atomic

absorption on a Perkin Elmer AAnalyst 800. Al was also analyzed by ICP-MS, using matrix-matched standard addition curves and internal standard monitoring on a Perkin Elmer DRC-II or DRC-e. In 2006, sulfite and thiosulfate were analyzed on board ship by preservation/derivitization and liquid chromatography (Vairavamurthy and Mopper, 1990). In 2009, samples were preserved with formaldehyde with minimal air exposure and analyzed on shore for dissolved sulfite (detection limit 20  $\mu\text{mol/kg}$ ) and thiosulfate (detection limit 30  $\mu\text{mol/kg}$ ) by ion chromatography (Dionex DX500 with AS11HC column, NaOH eluent, and conductivity detection) after removal of >99% of Cl and  $\text{SO}_4$  by precipitation in Dionex On-Guard Ag-Ba-H cartridges (method paper in preparation). Thiosulfate was below detection on all formaldehyde-preserved samples analyzed. Sulfate was analyzed in formaldehyde-preserved samples (without removal of Cl/ $\text{SO}_4$ ) to determine the initial sulfate content at the time of preservation. Chromatographic peaks for chloride, sulfite, and sulfate were resolved and samples with millimolar levels of sulfite did not require pre-treatment to remove sulfate. [Sulfate analyzed in non-preserved samples from previous years (Table DR4) gives an approximate measure of the total excess dissolved sulfur species, primarily sulfite and sulfate, after sulfite has oxidized partially or completely to sulfate during sample storage.] Sample J2-401-PF2 collected 4/8/09 with in-situ filtration had a thick pale yellow layer on the filter, assumed to be dominantly elemental sulfur. This material was dried to constant weight (for >two weeks in a dessicator, not under vacuum to avoid sublimation) and weighed on a micro-balance to estimate maximum particulate sulfur content assuming that all material was elemental sulfur. Particulate mass was converted to suspended sulfur concentration using the measured fluid volume passed through the filter. This particular sample had small volume due to sulfur clogging the filter, and no formaldehyde preserved cut was taken. Sulfite was analyzed on 5/22/09 in a sample stored in a tightly capped bottle with no headspace after removal of sulfate and chloride, and total sulfate plus sulfite was analyzed 5/27/09 [results in Table DR1].

The 1-sigma precision of the reported results is: pH, 0.02 pH units; dissolved Si, 2%; Fe and Mn, 4%; Al, 8%; K, Mg, Ca, 1.5%;  $\text{H}_2\text{S}$ , 5%;  $\text{SO}_4^-$ , 2%;  $\text{SO}_2(\text{aq})$ , 10%,  $\text{S}_2\text{O}_3^-$ , 15%.

Titanium gas-tight samples of fluid and free gas were processed at sea and analyzed on shore, and were previously reported (Lupton et al., 2008). The sulfur gas content was calculated by the difference between manometric total gas and total analyzed gas by chromatography. Because only trace  $\text{H}_2\text{S}$  was present in any of the analyzed samples, and no  $\text{H}_2\text{S}$  smell was present in the extracted gas, the sulfur gas is assumed to be  $\text{SO}_2$ .

To estimate a reasonable primary magmatic gas composition for Figure 2, we took the composition predicted for  $\text{H}_2\text{O}$ ,  $\text{CO}_2$  and  $\text{SO}_2$  from Moretti and Papale (2004) and the high-temperature (750-800°C)  $\text{H}_2$  concentration from Saito et al (2002). The primary gas

composition in Figure 2 is an estimate, not a direct measurement of gas at magmatic temperatures.

**Submarine arc SO<sub>2</sub> flux calculation.** To estimate the magnitude of the SO<sub>2</sub> flux from submarine arc volcanoes, we make a simple calculation as follows. Take the product of the global hydrothermal heat flux for the MOR axis (for crust <1Ma, from Stein and Stein, 1994), the proportion of total hydrothermal heat produced by submarine volcanic arcs from Baker et al., 2008 (10% of MOR flux), the proportion of submarine arc heat produced by eruptions (1/4 to 1/2 from White et al., 2006), and the average excess sulfur/heat ratio determined from NW Rota volcanic vent fluids. In detail, the numbers are:  $3.3 \times 10^{12} \text{ J/s} \times 3600 \text{ s/hr} \times 24 \text{ h/d} \times 365 \text{ d/y} \times 0.1 \times 0.25 \text{ (or 0.5)} \times 275 \text{ nmol/J} \times 10^{-9} \text{ mol/nmol} = 0.7 \text{ (to 1.4)} \times 10^{11} \text{ mol of S/y}$ . This is comparable in magnitude to the estimate of  $3.15 \times 10^{11} \text{ mol SO}_2/\text{y}$  for all subaerial arc volcanoes (Fischer, 2008).

## References for Supplementary Material

- Baker, E.T., Embley, R.W., Walker, S.L., Resing, J.A., Lupton, J.E., Nakamura, K.-I., de Ronde, C.E.J., and Massoth, G.J., 2008, Hydrothermal activity and volcano distribution along the Mariana Arc: *Journal of Geophysical Research*, v. 113, p. B08S09, doi:10.1029/2007JB005423.
- Cline, J., 1969, A spectrophotometric method for the determination of dissolved hydrogen sulfide: *Limnology and Oceanography*, v. 14, p. 454-458.
- Deardorff, N. D., K. V. Cashman, and W. W. Chadwick, Jr., 2011, Observations of eruptive plumes and pyroclastic deposits from submarine explosive eruptions at NW Rota-1, Mariana Arc: *Journal of Volcanology and Geothermal Research*, in press, doi:10.1016/j.jvolgeores.2011.01.003.
- Fischer, T.P., 2008, Fluxes of volatiles (H<sub>2</sub>O, CO<sub>2</sub>, N<sub>2</sub>, Cl, F) from arc volcanoes: *Geochemical Journal*, v. 4p, p. 21-38.
- Lupton, J., M. Lilley, D. Butterfield, L. Evans, R. Embley, G. Massoth, B. Christenson, K.-I. Nakamura, and M. Schmidt, 2008, Venting of a separate CO<sub>2</sub>-rich gas phase from submarine arc volcanoes: Examples from the Mariana and Tonga-Kermadec arcs: *Journal of Geophysical Research*, v. 113, B08S12, doi: 10.1029/2007JB005467.
- Moretti, R. and P. Papale, 2004, On the oxidation state and volatile behavior in multicomponent gas–melt equilibria: *Chemical Geology*, v. 213, p. 265-280.
- Saito, G., H. Shinohara, and K. Kazahaya, Successive sampling of fumarolic gases at Satsuma-Iwojima and Kuju volcanoes, southwest Japan: Evaluation of short-term variations and precision of the gas-sampling and analytical techniques, *Geochem. J.*, 36, 1-20, (2002).

- Stein, C.A. and Stein, S., 1994, Constraints on hydrothermal heat-flux through the oceanic lithosphere from global heat-flow: *Journal of Geophysical Research*, v. 99, p. 3081-3095.
- Vairavamurthy, A. & Mopper, K. Determination of sulfite and thiosulfate in aqueous samples including anoxic seawater by liquid chromatography after derivatization with 2,2'-dithiois(5-nitropyridine). *Environ. Sci. Technol.*, 24, 333-337 (1990)
- Von Damm, K., Edmond, J.M., Grant, B., Measures, C.I., Walden, B., and Weiss, R.F., 1985, Chemistry of hydrothermal solutions at 21°N, East Pacific Rise: *Geochimica et Cosmochimica Acta*, v. 49, p. 2197-2220.
- White, S.M., Crisp, J.A., and Spera, F.J., 2006, Long-term volumetric eruption rates and magma budgets: *Geochemistry Geophysics Geosystems*, v. 7, p. Q03010, doi:10.1029/2005GC001002.

**Supplementary video caption:**

Windows Media Video file (VideoDR1.wmv) extracted from Jason 2 dive 189, April 25, 2006 at 07:04 UT shows an intense bright yellow plume of fine molten sulfur droplets driven up into a rising volcanic plume during a slow lava eruption. This level of activity persisted for more than one hour. We believe this represents slowly ascending lava driving off elemental sulfur accumulated at the top of the lava conduit. Small lava bombs are seen falling back down into the vent. Abundant gas bubbles indicate active magma degassing from the lava conduit. The nearly continuous churning in middle foreground may be caused by seawater boiling in contact with hot rock or by gas bursts through accumulated tephra in the vent. The two red spots are lasers with 10 cm spacing. For details on NW Rota eruption dynamics, see Chadwick et al. 2008 and Deardorff et al., 2011.

TABLE DR1. 2009 FLUID SULFUR CHEMISTRY AT BRIMSTONE VENT

| Sample number           | Average temperature °C | Heat content relative to ambient J/g | H <sub>2</sub> S mmol/kg | Sulfite mmol/kg | Initial sulfate mmol/kg | Total excess dissolved sulfur mmol/kg | Excess dissolved sulfur to heat nmol/J |
|-------------------------|------------------------|--------------------------------------|--------------------------|-----------------|-------------------------|---------------------------------------|----------------------------------------|
| J2 401-P1               | 37.7                   | 131.1                                | n.m.                     | 40.1            | 37.5                    | 49.9                                  | 381                                    |
| J2 401-PF2              | 49.8                   | 181.4                                | n.m.                     | 33.3            | 34.4                    | 39.7                                  | 219                                    |
| J2 401-P3               | 35.1                   | 120.4                                | 0.002                    | 24.2            | 35.6                    | 32.1                                  | 267                                    |
| J2 401-P6               | 201.3                  | 810.1                                | 0.001                    | 133.6           | 60.5                    | 166.4                                 | 205                                    |
| J2 405-P6               | 48.0                   | 173.9                                | 0.001                    | 62.0            | 40.3                    | 74.6                                  | 429                                    |
| J2 405-PF7              | 46.4                   | 167.2                                | <0.001                   | 54.6            | 39.3                    | 66.2                                  | 396                                    |
| J2 403-B24              | 17.3                   | 46.5                                 | <0.001                   | 2.7             | 31.7                    | 6.7                                   | 144                                    |
| J2 403-PF4              | 13.0                   | 28.6                                 | <0.001                   | 2.5             | 29.7                    | 4.5                                   | 156                                    |
| Brimstone average       | 50                     | 207                                  | 0.001                    | 44              | 39                      | 55                                    | 275                                    |
| Brimstone std. dev.     | 59                     | 250                                  | 0.001                    | 42              | 10                      | 52                                    | 113                                    |
| MOR high-T vent average | 315.6                  | 1547                                 | 7.6                      | 0               | 0                       | -20.6                                 | -13                                    |

*Note:* All fluid samples in this table except 401-PF2 were preserved with formaldehyde. Initial sulfate is an upper limit for the sulfate concentration at the time of sampling. Total excess dissolved sulfur is the sum of all dissolved sulfur species minus background seawater sulfate. Negative numbers represent a net loss from seawater. We determined 5.15 mmol/kg particulate sulfur in sample J2-401-PF2 by in-situ filtration followed by drying and weighing. This level of particulate sulfur is 60% in excess of what would be produced by reaction 2 based on the excess sulfate relative to seawater in this sample when it was analyzed. n.m. means not measured.

TABLE DR2. BRIMSTONE VENT SAMPLE INFORMATION

| Sample ID    | Date collected | Depth m | latitude °N | longitude °E | Sample type     |
|--------------|----------------|---------|-------------|--------------|-----------------|
| R783-B17     | 3/30/2004      | 566     | 14.5965     | 144.7777     | bag             |
| R783-P20     | 3/30/2004      | 549     | 14.5965     | 144.7777     | piston          |
| R786-B8      | 4/1/2004       | 561     | 14.6008     | 144.7753     | bag             |
| R786-BF11    | 4/1/2004       | 561     | 14.6008     | 144.7753     | filtered bag    |
| R786-P4      | 4/1/2004       | 561     | 14.6008     | 144.7753     | piston          |
| R786-P5      | 4/1/2004       | 561     | 14.6008     | 144.7753     | piston          |
| J2-187-B9    | 4/23/2006      | 559.6   | 14.6009     | 144.7754     | bag             |
| J2-187-PF24  | 4/23/2006      | 562     | 14.6009     | 144.7754     | filtered piston |
| J2-187MajBlu | 4/23/2006      | 563     | 14.6010     | 144.7754     | Ti Major        |
| J2-188MajYel | 4/24/2006      | 564     | 14.6013     | 144.7764     | Ti Major        |
| J2-188MajBlu | 4/24/2006      | 563     | 14.6009     | 144.7754     | Ti Major        |
| J2-189MajWht | 4/25/2006      | 559     | 14.5991     | 144.7778     | Ti Major        |
| J2-189MajRed | 4/25/2006      | 560     | 14.5992     | 144.7778     | Ti Major        |
| J2-191-PF1   | 4/27/2006      | 557     | 14.6010     | 144.7755     | filtered piston |
| J2-192-BF11  | 4/28/2006      | 558.4   | 14.6009     | 144.7751     | filtered bag    |
| J2-398-PF4   | 4/5/2009       | 523.3   | 14.6008     | 144.7754     | filtered piston |
| J2-398-P8    | 4/5/2009       | 523.3   | 14.6008     | 144.7754     | piston          |
| J2-398-B24   | 4/5/2009       | 523.4   | 14.6008     | 144.7754     | bag             |
| J2-398-PF2   | 4/5/2009       | 524     | 14.6007     | 144.7754     | filtered piston |
| J2-401-P1    | 4/8/2009       | 523.1   | 14.6006     | 144.7753     | piston          |
| J2-401-PF2   | 4/8/2009       | 523.1   | 14.6006     | 144.7753     | filtered piston |
| J2-401-P3    | 4/8/2009       | 523.2   | 14.6006     | 144.7753     | piston          |
| J2-401-P6    | 4/8/2009       | 522.8   | 14.6007     | 144.7754     | piston          |
| J2-403-B24   | 4/10/2009      | 519.1   | 14.6007     | 144.7753     | bag             |
| J2-403-PF4   | 4/10/2009      | 519     | 14.6007     | 144.7753     | filtered piston |
| J2-403-P1    | 4/10/2009      | 519     | 14.6007     | 144.7753     | piston          |
| J2-405-P3    | 4/11/2009      | 521.5   | 14.6008     | 144.7754     | piston          |
| J2-405-P5    | 4/11/2009      | 521.5   | 14.6008     | 144.7754     | piston          |
| J2-405-PF2   | 4/11/2009      | 521.4   | 14.6008     | 144.7755     | filtered piston |
| J2-405-B22   | 4/11/2009      | 521.5   | 14.6008     | 144.7755     | bag             |
| J2-405-B21   | 4/11/2009      | 521     | 14.6009     | 144.7755     | bag             |
| J2-405-P6    | 4/11/2009      | 521.2   | 14.6008     | 144.7755     | piston          |
| J2-405-PF7   | 4/11/2009      | 521.2   | 14.6008     | 144.7754     | filtered piston |
| J2-405-P8    | 4/11/2009      | 521.3   | 14.6008     | 144.7754     | piston          |
| J2-405-PF9   | 4/11/2009      | 520.8   | 14.6008     | 144.7754     | filtered piston |
| J2-405-BF18  | 4/11/2009      | 520.8   | 14.6008     | 144.7754     | filtered bag    |

*Note:* in the sample ID prefix, R=ROPOS and J2=Jason 2. An F in the ID suffix means the sample was filtered through a 0.4 micron filter as it was taken.

TABLE DR3. VOLCANIC VENT FLUID AND BACKGROUND SEAWATER COMPOSITION (1)

| Sample ID            | Vent              | Date collected | Tmax<br>°C | Tavg<br>°C | pH<br>at 22°C | dissolved silica<br>μmol/kg | Fe<br>μmol/kg | Mn<br>μmol/kg |
|----------------------|-------------------|----------------|------------|------------|---------------|-----------------------------|---------------|---------------|
| R783b17              | Brimstone         | 3/30/2004      | 29.8       | 25.8       | 2.09          | 1112                        | 192.5         | 35.3          |
| R783p20              | Brimstone Rim     | 3/30/2004      | 16.7       | 12.8       | 3.00          | 388                         | 62.4          | 11.1          |
| R786p4               | Brimstone         | 4/1/2004       | 26.1       | 23.6       | 2.21          | 1101                        | 220.4         | 25.9          |
| R786p5               | Brimstone         | 4/1/2004       | 29.4       | 22.6       | 2.26          | 838                         | 173.8         | 20.3          |
| R786b8               | Brimstone         | 4/1/2004       | 27.1       | 23.3       | 2.11          | 1286                        | 242.8         | 33.6          |
| R786bf11             | Brimstone         | 4/1/2004       | 29.5       | 25.5       | 1.98          | 1234                        | 278.2         | 30.0          |
| J2-187-B9            | Brimstone         | 4/23/2006      | 28.2       | 25.4       | 1.64          | n.d.                        | 1616          | 32.2          |
| J2-187PF24           | Brimstone         | 4/23/2006      | 95.3       | 90.2       | 1.91          | 550                         | 117           | 4.66          |
| J2-187MajBlu         | Brimstone         | 4/23/2006      | 95         | n.d.       | 1.72          | 3190                        | 2002          | 35.9          |
| J2-188MajYel         | Brimstone         | 4/24/2006      | 110        | n.d.       | 1.66          | 1350                        | 479           | 9.40          |
| J2-188MajBlu         | Brimstone         | 4/24/2006      | 95         | n.d.       | 1.05          | 7060                        | 1873          | 33.4          |
| J2-189MajWht         | Brimstone         | 4/25/2006      | 200        | n.d.       | 1.35          |                             | 808           | 15.6          |
| J2-189MajRed         | Brimstone         | 4/25/2006      | 256.6      | 200        | 2.11          |                             | 746           | 16.7          |
| J2-191-PF1           | Brimstone         | 4/27/2006      | 41.9       | 37.6       | 1.78          |                             | 473           | 8.38          |
| J2-407-PF4           | Bckgnd SW<br>581m | 4/13/2009      | 6.4        | 6.2        | 7.32          | 70                          | <0.09         | <0.04         |
| J2-398-PF4           | Brimstone         | 4/5/2009       | 80.5       | 53.3       | 3.80          | 98                          | 10.9          | 0.59          |
| J2-398-P8            | Brimstone         | 4/5/2009       | 31.2       | 22.5       | 5.23          | 94                          | 13.3          | 0.68          |
| J2-398-PF2           | Brimstone         | 4/5/2009       | 26.4       | 22.2       | 5.86          | 71                          | 17.9          | <0.04         |
| J2-401-P1            | Brimstone         | 4/8/2009       | 46.9       | 37.7       | 1.54          | 2547                        | 807           | 16.0          |
| J2-401-PF2           | Brimstone         | 4/8/2009       | 58.4       | 49.8       | 1.62          |                             | 604           | 11.6          |
| J2-401-P3            | Brimstone         | 4/8/2009       | 41.9       | 35.1       | 1.66          | 2581                        | 982           | 69.9          |
| J2-401-P6            | Brimstone         | 4/8/2009       | 207.4      | 201.3      | 1.06          | 7032                        | 2737          | 114           |
| J2-403-B24           | Brimstone         | 4/10/2009      | 20.5       | 17.3       | 3.97          | 1316                        | 255           | 21.0          |
| J2-403-PF4           | Brimstone         | 4/10/2009      | 17.6       | 13         | 4.78          | 577                         | 122           | 9.33          |
| J2-403-P1            | Brimstone         | 4/10/2009      | 21.2       | 18.5       | 3.65          | 1431                        | 300           | 21.7          |
| J2-405-P3            | Brimstone         | 4/11/2009      | 24.5       | 20.9       | 2.27          | 344                         | 103           | 2.60          |
| J2-405-P5            | Brimstone         | 4/11/2009      | 34.7       | 19         | 2.25          |                             | 142           | 3.48          |
| J2-405-PF2           | Brimstone         | 4/11/2009      | 44.5       | 40.6       | 2.55          | 273                         | 64.6          | 1.75          |
| J2-405-B22           | Brimstone         | 4/11/2009      | 38.7       | 35.2       | 1.96          | 628                         | 188           | 5.09          |
| J2-405-B21           | Brimstone         | 4/11/2009      | 21.5       | 19.2       | 5.65          | 257                         | 33.8          | 7.37          |
| J2-405-P6            | Brimstone         | 4/11/2009      | 55.7       | 48         | 1.49          | 4280                        | 1108          | 20.6          |
| J2-405-PF7           | Brimstone         | 4/11/2009      | 57.9       | 46.4       | 1.51          | 4231                        | 1145          | 20.9          |
| J2-405-P8            | Brimstone         | 4/11/2009      | 48.4       | 41.2       | 1.43          | 4037                        | 1043          | 18.9          |
| J2-405-PF9           | Brimstone         | 4/11/2009      | 39.5       | 35.2       | 1.69          | 1724                        | 457           | 10.7          |
| J2-405-BF18          | Brimstone         | 4/11/2009      | 35.1       | 28.8       | 1.96          | 1295                        | 332           | 7.19          |
| Brimstone average    |                   |                | 59.8       |            | 2.4           | 1819                        | 581           | 20.5          |
| MOR Hot Vent Average |                   |                | 315.6      |            | 3.5           | 16000                       | 4600          | 1190.0        |
| Ratio Volc. Vent:MOR |                   |                | 0.19       |            |               | 0.11                        | 0.13          | 0.02          |

TABLE DR3. VOLCANIC VENT FLUID AND BACKGROUND SEAWATER COMPOSITION (2)

| Sample ID      | Fe/Mn | Fe/heat<br>nmol/J | Mn/heat<br>nmol/J | Al<br>μmol/kg | Al/heat<br>nmol/J | K<br>mmol/kg | Mg<br>mmol/kg | Ca<br>mmol/kg |
|----------------|-------|-------------------|-------------------|---------------|-------------------|--------------|---------------|---------------|
| R783b17        | 5.5   | 2.5               | 0.45              | 67            | 0.9               | 10.32        | 52.64         | 10.47         |
| R783p20        | 5.6   | 2.5               | 0.45              | 19            | 0.8               | 10.11        | 55.85         | 11.16         |
| R786p4         | 8.5   | 3.2               | 0.37              | 122           | 1.7               | 9.81         | 50.71         | 9.77          |
| R786p5         | 8.5   | 2.7               | 0.31              | 96            | 1.5               | 9.99         | 51.57         | 10.12         |
| R786b8         | 7.2   | 3.6               | 0.49              | 154           | 2.3               | 10.27        | 52.87         | 10.16         |
| R786bf11       | 9.3   | 3.6               | 0.39              | 141           | 1.8               | 10.01        | 51.58         | 9.89          |
| J2-187B9       | 50.17 | 21.05             | 0.420             | 1820          | 23.6              | 10.18        | 54.80         | 12.51         |
| J2-187PF24     | 25.15 | 0.34              | 0.013             | 115           | 0.3               | 8.99         | 48.76         | 9.16          |
| J2-187MajBlu   | 55.80 | 5.47              | 0.098             | 409           | 1.1               | 10.38        | 54.85         | 9.20          |
| J2-188MajYel   | 50.92 | 1.12              | 0.022             | 462           | 1.1               | 9.70         | 49.95         | 10.07         |
| J2-188MajBlu   | 56.16 | 5.12              | 0.091             | 2558          | 7.0               | 8.26         | 44.26         | 11.04         |
| J2-189MajWht   | 51.84 | 1.01              | 0.019             | 661           | 0.8               | 9.66         | 54.13         | 11.41         |
| J2-189MajRed   | 44.58 | 0.70              | 0.016             | 376           | 0.5               | 9.33         | 50.12         | 9.22          |
| J2-191PF1      | 56.52 | 3.72              | 0.066             | 814           | 6.4               | 9.60         | 52.19         | 10.31         |
| J2-407-PF4     | n.d.  | n.d.              | n.d.              | <0.01         | n.d.              | 9.99         | 52.39         | 10.28         |
| J2-398PF4      | 18.5  | 0.06              | 0.00              | 14.6          | 0.1               | 9.79         | 50.91         | 9.87          |
| J2-398-P8      | 19.6  | 0.20              | 0.01              | 9.9           | 0.2               | 9.84         | 52.50         | 9.85          |
| J2-398-PF2     | n.d.  | 0.27              | n.d.              | 3.1           | 0.0               | 9.93         | 52.01         | 10.16         |
| J2-401-P1      | 50.6  | 6.15              | 0.12              | 1412          | 11.0              | 9.68         | 51.59         | 11.31         |
| J2-401-PF2     | 52.1  | 3.33              | 0.06              | 1087          | 6.1               | 9.79         | 51.11         | 10.79         |
| J2-401-P3      | 14.1  | 8.16              | 0.58              | 1192          | 10.1              | 9.75         | 51.43         | 10.75         |
| J2-401-P6      | 24.0  | 3.38              | 0.14              | 2008          | 2.5               | 9.15         | 46.69         | 11.94         |
| J2-403-B24     | 12.1  | 5.49              | 0.45              | 1890          | 43.4              | 10.25        | 52.81         | 10.45         |
| J2-403-PF4     | 13.1  | 4.26              | 0.33              | 922           | 35.8              | 10.08        | 52.45         | 10.37         |
| J2-403-P1      | 13.8  | 5.83              | 0.42              | 2231          | 45.9              | 10.21        | 52.80         | 10.62         |
| J2-405-P3      | 39.6  | 1.68              | 0.04              | 106           | 1.8               | 9.94         | 51.95         | 10.04         |
| J2-405-P5      | 40.8  | 2.65              | 0.07              | 242           | 4.8               | 9.99         | 52.03         | 10.14         |
| J2-405-PF2     | 36.9  | 0.45              | 0.01              | 351           | 2.5               | 9.95         | 52.17         | 10.08         |
| J2-405-B22     | 36.9  | 1.56              | 0.04              | 144           | 1.2               | 9.93         | 51.94         | 10.06         |
| J2-405-B21     | 4.6   | 0.62              | 0.14              | 64            | 1.2               | 10.01        | 52.65         | 10.18         |
| J2-405-P6      | 53.8  | 6.37              | 0.12              | 2156          | 12.6              | 9.54         | 50.13         | 11.78         |
| J2-405-PF7     | 54.9  | 6.85              | 0.12              | 1904          | 11.6              | 9.59         | 50.34         | 11.62         |
| J2-405-P8      | 55.2  | 7.16              | 0.13              | 1936          | 13.6              | 9.52         | 50.15         | 11.31         |
| J2-405-PF9     | 42.7  | 3.78              | 0.09              | 612           | 5.2               | n.d.         | n.d.          | n.d.          |
| J2-405-BF18    | 46.2  | 3.52              | 0.08              | 470           | 5.1               | 9.92         | 52.10         | 10.37         |
| Brimstone Avg. | 32.3  | 3.8               | 0.19              | 781.4         | 5.7               | 9.8          | 51.6          | 10.5          |
| MOR Avg.       | 4.3   | 3.10              | 0.78              | 5.5           | 0.0036            | 22.6         | 0.0           | 31.4          |
| Volc:MOR       | 7.51  | 1.22              | 0.24              | 142           | 1603              | 0.43         |               | 0.33          |



TABLE DR4. Sulfur Species in 2004/2006 Volcanic Vent Fluids

|              | H <sub>2</sub> S $\mu$ M | SO <sub>4</sub> mM | S <sub>2</sub> O <sub>3</sub> $\mu$ m | SO <sub>2</sub> (aq) mM |
|--------------|--------------------------|--------------------|---------------------------------------|-------------------------|
| R786p5       | 11.7                     | 33.3               | n.m.                                  | n.m.                    |
| R783p20      | 25.0                     | 31.0               | n.m.                                  | n.m.                    |
| R783b17      | 64.3                     | 34.0               | n.m.                                  | n.m.                    |
| R786b8       | 8.8                      | 35.8               | n.m.                                  | n.m.                    |
| R786p4       | 5.2                      | 34.4               | n.m.                                  | n.m.                    |
| R786bf11     | 3.4                      | 36.9               | n.m.                                  | n.m.                    |
| R786b17      | 20.2                     | 27.7               | n.m.                                  | n.m.                    |
| J2-187B9     | bdl                      | 67.7               | n.m.                                  | n.m.                    |
| J2-187MajBlu | bdl                      | 57.3               | 79.1                                  | 68.9                    |
| J2-187PF24   | bdl                      | 47.0               | 0                                     | 14.3                    |
| J2-188MajBlu | bdl                      | 164.9              | n.m.                                  | 163.0                   |
| J2-188MajYel | bdl                      | 63.7               | n.m.                                  | 21.3                    |
| J2-189MajRed | 39.6                     | 29.5               | n.m.                                  | n.m.                    |
| J2-189MajWht | n.m.                     | 44.2               | n.m.                                  | 49.4                    |
| J2-191PF1    | bdl                      | 57.1               | n.m.                                  | 16.7                    |
| J2-192BF11   | bdl                      | 32.5               | n.m.                                  | n.m.                    |

bdl=below detection limit (0.8 $\mu$ M for H<sub>2</sub>S). n.m.=not measured.

## Supplementary Figures

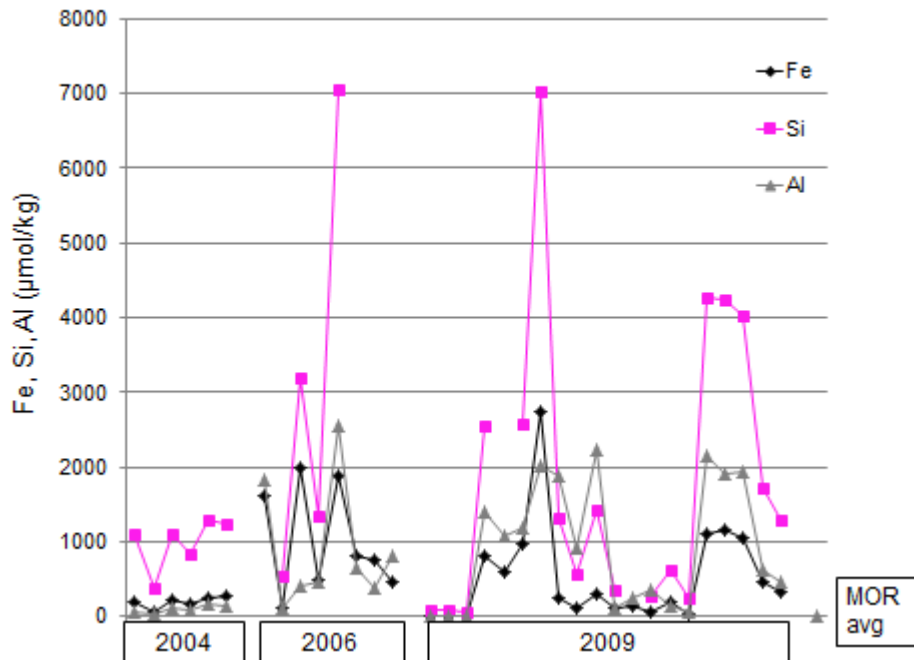

**Supplementary Figure DR1.** Concentrations of major rock components iron, silica and aluminum dissolved in Brimstone volcanic vent fluids. Samples are in chronological order left to right. Samples show high variability due to variable seawater mixing and extent of reaction with rock substrate. Both the Si/Fe and Al/Fe ratios of these fluids average approximately 50% of the rock ratio, indicative of slower uptake of silica and aluminum into solution and/or solubility limitations. Average Al concentration for high-temperature MOR fluids (5.5μM) is shown at far right for comparison.

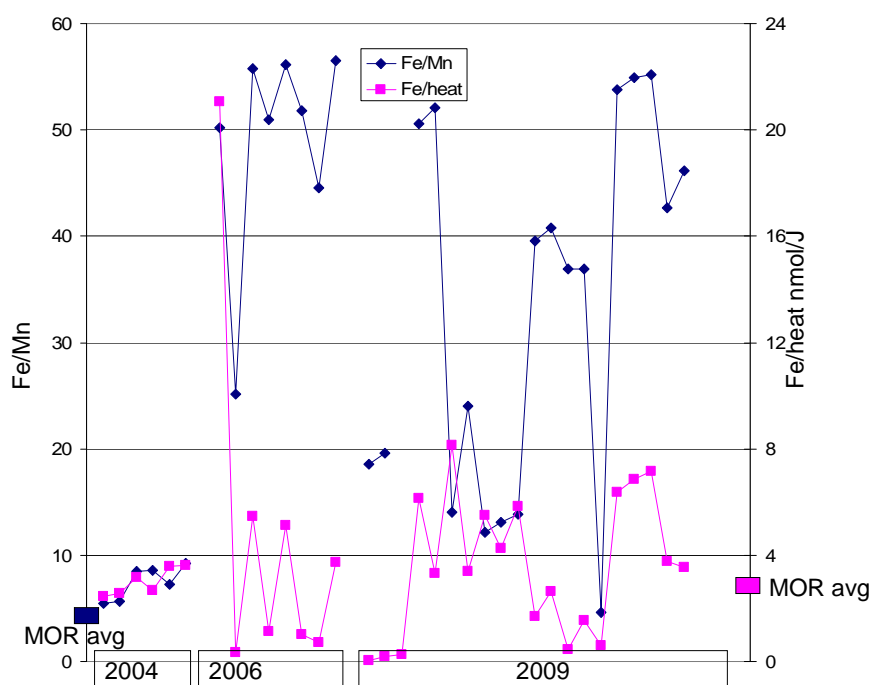

**Supplementary Figure DR2.** Fe/Mn molar ratio (left axis) and Fe/heat ratio (right axis) in NW Rota volcanic vent fluids. The Fe/Mn ratio (dark blue diamonds) is variable, at times reaching the rock ratio of 55, consistent with congruent dissolution of rock surrounding/covering the eruptive conduit. Lower Fe/Mn ratios indicate solubility limitation and precipitation of secondary iron phases. The average Fe/Mn of all arc volcanic vent samples is 31, considerably higher than the MOR average of 4.3, indicated on the left axis. The Fe/heat ratio is also highly variable, and the overall average of all samples is 3.8, slightly higher than the MOR average of 3.1, shown on the right axis. The near equality of Fe/heat ratios in arc volcanic vents and MOR vents means that they have the same relative importance for global iron flux to the oceans. The flux of Mn from volcanic vents is considerably less than that from MOR vents.

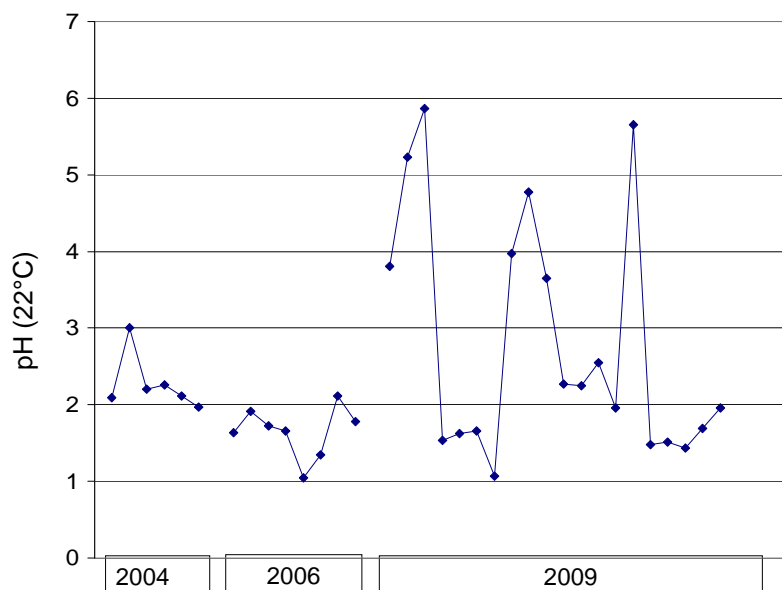

**Supplementary Figure DR3.** pH (measured shipboard at 22°C) in volcanic vent fluids from Brimstone eruptive vent. Data are in chronological order left to right. 2004 samples are more dilute because they were taken in a buoyant plume within the eruptive pit crater.

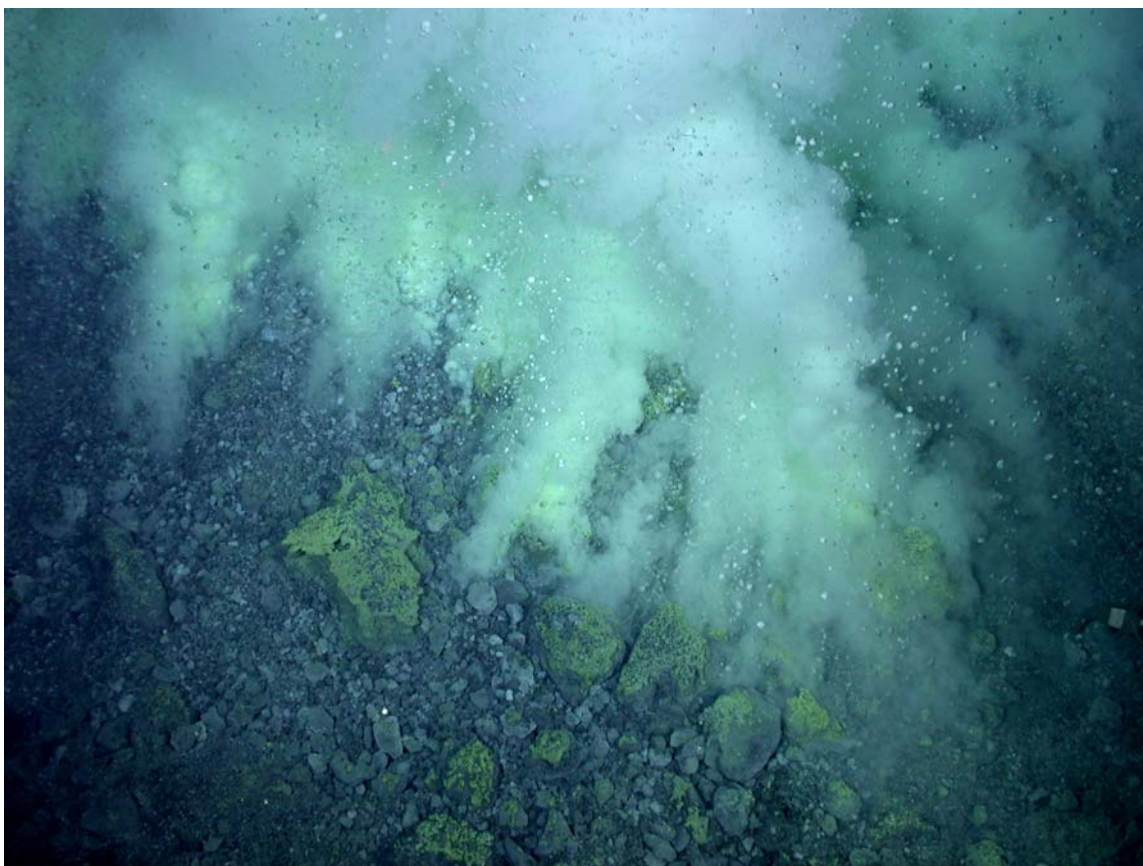

**Supplementary Figure DR4.** NW Rota, Brimstone vent, 2006, Jason-2 dive 188. Gas bubbles, white and yellow sulfur-rich particles venting through volcaniclastic material, including rocks coated with sulfur. Note that yellow smoke is proximal to the volcanic vent, with white smoke and gas bubbles on the distal edges. Temperature probe measurements beneath the white smoke were less than the melting point of sulfur ( $\sim 115^{\circ}\text{C}$ ). Molten sulfur is present beneath yellow smoke, with temperatures from 120 to  $256^{\circ}\text{C}$  measured.

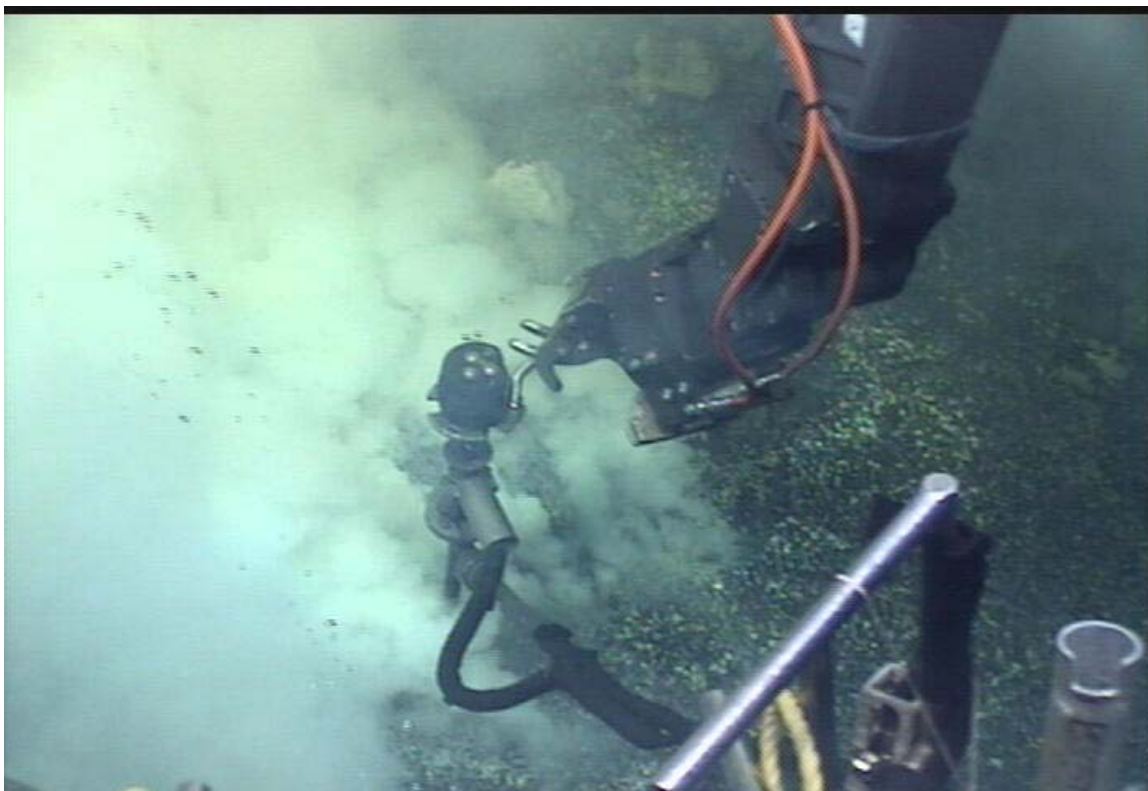

**Supplementary Figure DR5.** Sampling fluids with HFPS nozzle in sulfur-rich volcaniclastic material on the edge of Brimstone eruptive vent, dive J2-401, 4/8/2009. In-line fluid temperatures were 25-60°C at this spot beneath white smoke. Minutes later, in a spot beneath yellow smoke approximately 30cm away from this location, fluid temperatures up to 207°C, with pH of 1.05 were measured.

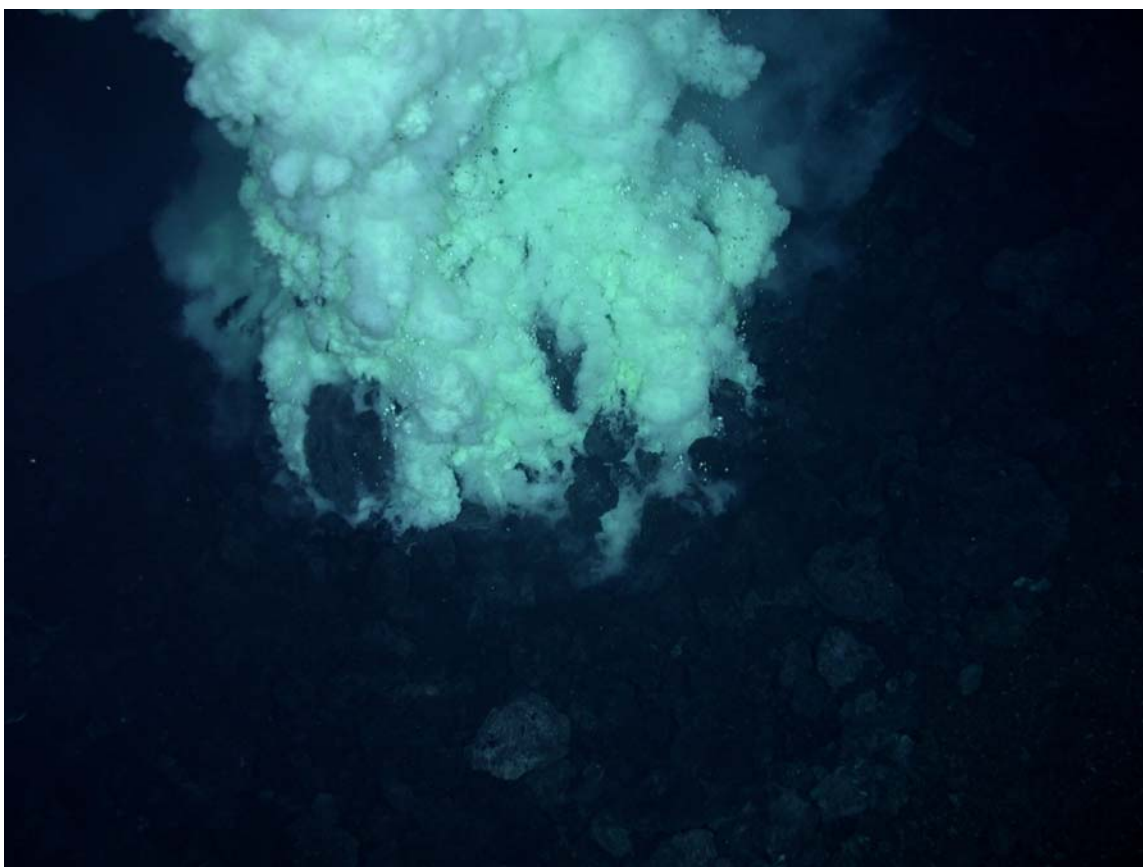

**Supplementary Figure DR6.** NW Rota 2006, Brimstone vent. Slowly extruding lava plug giving off yellow and white sulfur smoke and gas bubbles, indicative of active magma degassing during extrusion. Temperature measured on the surface of one of these “smoking rocks” reached 256°C, near the seawater boiling point of 265° at 550m depth.



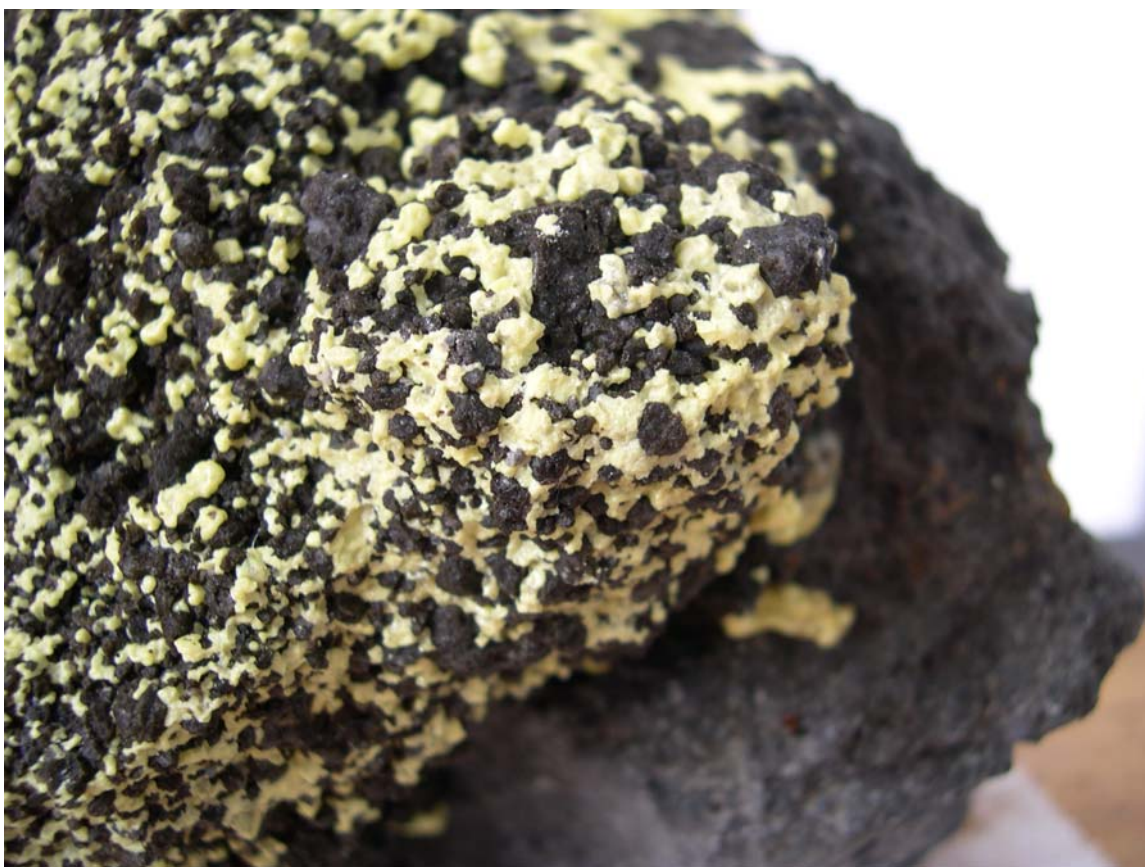

**Supplementary Figure DR7.** Rock collected near Brimstone vent, NW Rota, 2006. Sample is a lava bomb with one side coated with cemented breccia of sulfur and volcaniclastic basaltic andesite. This is indicative of lava ascending and erupting through a sulfur cap, pushing molten sulfur up through loose material covering the vent. (Field of view is 7x11cm).
